# Supplementary material for: Synthesis and Evaluation of a Hybrid Miltefosine-Silver Nanoparticle Complex: Synergistic Interaction with Benznidazole Against Trypanosoma cruzi
Source: Research Square preprint supplement (doi:10.21203/rs.3.rs-6294121/v1), 2025-04-23
Supplement: Supplementary file 1 [file 0037d866bbfcc7209f8bd02d.docx]

**Graphical Abstract**

In this study, oxidized amylose-miltefosine-silver (OA-MilAg-NP) hybrid nanoparticles were synthesized. The characterization of the nanoparticles was performed using FTIR, SEM, and TEM analyses. The cytotoxicity of the hybrid OA-MilAg-NPs was evaluated on the L929 fibroblast cell line. The antitrypanosomal activity of the synthesized nanoparticles against T. cruzi isolates was determined using the *in vitro* broth microdilution method, while their synergy with benznidazole was assessed using the checkerboard method.
